# 1 Prevalence of pesticides in European water and 2 relationship for public health: A protocol for systematic 3 review and meta-analysis

4

5 Manuel Serrano Valera<sup>a</sup>, Nuria Vela<sup>a</sup>, Grasiela Piuvezam<sup>b\*</sup>, Francisco Mateo-Ramírez<sup>a</sup>,  
6 Isaac Davidson Santiago Fernandes Pimenta<sup>b</sup> and Isabel Martínez-Alcalá<sup>a</sup>.

7 <sup>a</sup>Universidad Católica de Murcia, Campus de Los Jerónimos, Guadalupe, 30107 Murcia,  
8 Spain.

9 <sup>b</sup>Federal University of Rio Grande do Norte (UFRN-Brasil) and Lab-SYS (Systematic  
10 Review and Meta-Analysis Laboratory-CNPq).

11 \*Corresponding author: [gpiuvezam@yahoo.com.br](mailto:gpiuvezam@yahoo.com.br)

12

## 13 Abstract

14 **Background:** There is currently a growing interest in the so-called emerging pollutants, such as  
15 pesticides, pharmaceuticals, personal hygiene care products, drugs, etc., whose presence in  
16 natural ecosystems is not necessarily recent, but the development in latest years of new and more  
17 sensitive methods of analysis have allowed their detection. They can be present in the natural  
18 environment, in food, and in many products of everyday origin, which suggests that human  
19 exposure is massive and universal. These contaminants correspond, in most cases, to unregulated  
20 substances, which may be candidates for future regulations, depending on research on their  
21 potential health effects and monitoring data regarding their prevalence. Therefore, the study of  
22 this type of substances is becoming one of the priority lines of research of the main agencies  
23 dedicated to the protection of public and environmental health, such as the World Health  
24 Organization (WHO), the United States Environmental Protection Agency (USEPA) or the  
25 European Union (EU). In this sense, it is of vital importance to know the nature and quantity of  
26 this type of contaminants, to establish preventive mechanisms that minimize their presence in the  
27 environment, including, of course, aquatic systems, with special requirements for water human  
28 consumption.

29 **Methods:** This systematic review and meta-analyzes protocol is conducted using the Preferred  
30 NOTE: This preprint reports new research that has not been certified by peer review and should not be used to guide clinical practice.  
Reporting Items for Systematic Reviews and Meta-Analyzes (PRISMA) statement guidelines and

31 the Cochrane Handbook of Systematic Reviews of Interventions. The papers should include  
32 monitoring studies carried out in pesticides polluted waters in Europe. Prevalence studies of  
33 emerging contaminants (pesticides) in water resources (watersheds, aquifers, river, marine and  
34 springs), waste waters (influent and effluent) and drinking water should be included. Therefore,  
35 the comprehensive search strategy will be conducted in the following databases: PubMed, Scopus,  
36 Web of Science, EMBASE, ScienceDirect. Two independent reviewers will conduct all study  
37 selection procedures, data extraction, and methodological evaluation, and disagreements will be  
38 referred to a third reviewer. RevMan 5.3 software will be used to gather data and perform the  
39 meta-analysis if possible.

40 **Discussion:** This systematic review should provide evidence on the presence of pesticides in  
41 European waters in order to establish preventive mechanisms that minimize their presence in the  
42 environment.

43 **Dissemination and ethics:** The findings of this scoping review will be disseminated in print, at  
44 conferences, or via peer-reviewed journals. Ethical approval is not necessary as this paper does  
45 not involve patient data.

46 **Systematic review registration:** PROSPERO CRD42022348332.

47 **Abbreviations:** EC = emerging pollutants. EU = European Union. PRISMA-P = Preferred  
48 Reporting Items for Systematic Reviews and Meta-Analyses Protocols. USEPA = United States  
49 Environmental Protection Agency. WHO = World Health Organization.

50 **Keywords:** Emerging contaminants, wastewater, water resources, drinking water, sanitation;  
51 Europe.

52

## 53 **1.- Introduction**

54 Water scarcity now affects all continents and constitutes one of the major challenges of the 21st  
55 century. Over the last years, water use and consumption grew at twice the rate of population  
56 growth and, although there is enough drinking water on the planet, its distribution is irregular, it  
57 is wasted, contaminated in many cases, and is often unsustainably managed [1]. The problem of  
58 supply is exacerbated by the fact that a large proportion of surface and groundwater is polluted  
59 by the discharge of waste generated by human activity. The United Nations estimates that every  
60 day 2 million tons of wastes are disposed of through watercourses. This reduces the availability  
61 of drinking water and makes it necessary to resort to treatment methods. Mankind's control over

62 these waters is now global and human beings now plays an important role in the water cycle.  
63 Although the measures taken in the last century to prevent environmental pollution have  
64 drastically reduced the presence of some pollutants, such as the so-called "persistent organic  
65 compounds", the number of known potentially dangerous substances that can affect the  
66 environment, and therefore man, is still very large. Research attention has been focused on the  
67 so-called "emerging pollutants" (ECs). ECs are natural or synthetic chemical substances of  
68 various etiologies whose presence in natural ecosystems is not necessarily new, although the  
69 development in recent years of new and more sensitive methods of analysis has made it possible  
70 to warn of their presence, so that concern about the possible consequences for human health has  
71 increased [2]. ECs occur in many kinds of daily chemicals including pesticides (used to protect  
72 crops from insects, weeds, fungi and other pests), disinfection by-products (swimming and  
73 drinking water purification such as chlorinated by-products), plasticizers (used to food packaging  
74 such as phthalates and bisphenols), human and veterinary pharmaceuticals (analgesics,  
75 antimicrobials, antidiabetics, antibiotics, antihistamine, or antiepileptics), manufactured  
76 nanomaterial (used in information technologies such as silicon dioxide and carbon nanotubes),  
77 and finally, preservatives and ultraviolet filters (used to personal care products such as parabens  
78 or benzophenones) [3].

79 The high risk lies in the fact that environmental and human toxicological information for most of  
80 the ECs have not been studied yet, therefore it is almost impossible to predict the health effects  
81 on living creatures [4]. In addition, the suspected effects could even be intensified on vulnerable  
82 groups such as infants and pregnant women as the damage in the very early development stages  
83 is significant [5].

84 Human and his environment are in contact with all these compounds, both from the moment of  
85 their manufacture and through the processes of distribution, use and final degradation. Also of  
86 concern is the expected increase in their number and concentration, due to the greater reuse of  
87 urban, agricultural and industrial wastewater, given the greater need for the availability of  
88 drinking water, which means that the study of this type of substances is becoming one of the  
89 priority lines of research of the main bodies dedicated to the protection of public and  
90 environmental health, such as the WHO, the USEPA and the EU. It should be noted that most  
91 ECs are not regulated, so they may be candidates for future regulation, depending on research on  
92 their potential health effects and monitoring data regarding their incidence.

93 On the other hand, the requirement to produce enough food to supply the world's population has  
94 had an impact on agricultural practices around the world. In many countries, this pressure has led  
95 to an expansion of irrigation and an increasing use of fertilizers and pesticides to achieve and  
96 maintain higher yields. It should be noted that agriculture is the largest user of freshwater  
97 resources, using a global average of 70% of all surface water supplies. Agriculture is both a cause  
98 and a victim of pollution of water resources. It is a cause, through the discharge of pollutants and

99 sediments into surface and/or groundwater and through the salinization and waterlogging of  
100 irrigated land. It is victimized using wastewater and contaminated surface and groundwater,  
101 which in turn affect crops and transmit diseases to consumers and agricultural workers. The EU  
102 establishes a framework for the prevention and control of water pollution that includes both  
103 measures to assess the chemical status of water and measures to reduce the presence of pollutants.  
104 As a matter of priority, as set out in Directive 2013/39/EU of 12 August 2013 amending Directives  
105 2000/60/EC and 2008/105/EC as regards priority substances in the field of water policy [6], the  
106 causes of pollution must be identified and pollutant emissions must be treated at the source itself,  
107 in the most economically and environmentally effective way. Some strategies were agreed in the  
108 Millennium Development Goals through the Sustainable Development Goals (SDGs),  
109 specifically the goal 6 "Ensure availability and sustainable management of water and sanitation  
110 for all" [7].

111 This fact is evident in the results of numerous worldwide monitoring studies carried out on  
112 wastewater in which a wide range of ECs have been found at different concentration levels,  
113 among which pesticides stand out for their high incidence [8-10].

114 This group of emerging contaminants is of particular concern to agencies such as WHO and  
115 European Food Safety Authority (EFSA). Pesticides are very important for food production, as  
116 they maintain and/or increase crop yields, which is especially important in countries suffering  
117 from food shortages. However, most of them are highly persistent in the environment, and can be  
118 highly toxic to humans. There is scientific evidence that exposure to pesticides can lead to various  
119 health problems such as immunosuppression, hormone disruption, reduced intelligence,  
120 reproductive distortion and cancer. In humans, the effects of pesticide exposure can be classified  
121 into acute health problems and chronic health problems. Chronic problems include references to  
122 neurological effects such as the onset of Parkinson's disease, reduced attention span, memory  
123 impairment, reproductive problems, impaired child development, birth defects and cancer. Acute  
124 effects include reduced vision, headaches, salivation, diarrhea, nausea, vomiting, wheezing, coma  
125 and even death. Moderate pesticide poisoning can cause intrinsic asthma, bronchitis and  
126 gastroenteritis [9]. These effects will depend on the chemical nature of the compound, the amount  
127 and the mode of exposure (ingestion, inhalation or direct skin contact).

128 The use of these substances in agriculture is regulated in developed countries, but unfortunately  
129 there is no such rigorous control in many other countries. Extensive EU legislation regulates the  
130 placing on the market and use of plant protection products and their residues in food. EFSA  
131 evaluates active substances used in plant protection products by providing scientific advice on  
132 toxicological risks. The risk assessment of active substances analyzes whether, when used  
133 correctly, these substances are likely to have any direct or indirect harmful effects on human or  
134 animal health, for example, through drinking water, food or feed, or on groundwater quality.

135 The EU and the Member States take regulatory risk management decisions, including the approval

136 of active substances and the establishment of legal limits for pesticide residues in food and feed  
137 (maximum residue levels or MRLs).

138 Despite all this regulation by the competent authorities, the presence of pesticide residues in  
139 aquatic ecosystems remains high, so it is of vital importance to know the nature and quantity of  
140 this type of contaminants, to establish preventive mechanisms to minimize their presence in the  
141 environment, including, of course, aquatic systems, with special requirements for water for human  
142 consumption.

143

## 144 **2. Objective**

145 The main objective of this work is to systematically review, analyze and synthesize the available  
146 evidence on the status of pesticides in waters in Europe. For this purpose, quantitative studies  
147 reporting the prevalence and/or a concentration of several types of pesticides such as glyphosate,  
148 chlorpyrifos, pyrethroid pesticides, neonicotinoid pesticides, and/or fungicides, in samples of  
149 different water resources like wastewaters and drinking water will be analyzed.

150 To our knowledge, this is the first systematic review and meta-analysis that collects and organizes  
151 the existing evidence on the pesticide's contamination of water resources [10], to quantify the  
152 environmental health status in the waters from Europe.

153

## 154 **3. Methods and analysis**

### 155 **3.1. Study registration**

156 This systematic review has been registered on PROSPERO (CRD42022348332) and will develop  
157 in accordance with the Preferred Reporting Items for Systematic Reviews and Meta-Analyses  
158 (PRISMA) statement guidelines [11] and the Cochrane Handbook of Systematic Reviews of  
159 Interventions [12].

### 160 **3.2. Study selection criteria**

#### 161 **3.2.1. Types of studies**

162 Prevalence studies of emerging contaminants (pesticides) should be included.

#### 163 **3.2.2. Types of participants**

164 Water resources (watersheds, aquifers, river, marine and springs) wastewaters (influent and  
165 effluent) and drinking waters contaminated by emerging pollutants should be included. The  
166 resources will be focused on water contamination by emerging pollutants in Europe.

### 167 **3.2.3. Types of interventions**

168 No interventions will be made in this study as the objective is to analyze the prevalence of  
169 pesticide contamination in European waters based on previously published monitoring data.

### 170 **3.2.4. Types of outcomes**

171 The results may include: 1. Improvement in the knowledge on the main sources of pesticide  
172 contamination in water at European level; 2. Increase in the information on which compounds  
173 have the highest frequency of occurrence; 3. Improved knowledge about the level of  
174 contamination by these compounds and the areas with the highest contamination load.

## 175 **3.3. Search strategy**

176 This systematic review will summarize evidence published by primary trials through a  
177 comprehensive search in the following databases: PubMed, Scopus, EMBASE, Web of Science  
178 and ScienceDirect. The search strategy results from a combination of free text search terms and  
179 Medical Subject Headings (MeSH), text words, and keywords. The following keywords will be  
180 used: word group 1: pesticides AND word group 2: water resources OR wastewater OR drinking  
181 water OR water OR sanitation AND word group 3: monitoring AND prevalence, AND word  
182 group 4: Europe. For example, the full search strategy for PubMed will be: (wastewater OR water  
183 resources OR drinking water OR sanitation AND pesticides).

184 The search terms used for the formation of the search equations will be combined with specific  
185 filters for each database. There will be limitations of time the articles selected for this review will  
186 be publications from 2015 onwards, as the EU Water Framework Directive (2000/60/EC) requires  
187 all Member States to protect and improve water quality to achieve good ecological status by 2015.  
188 In this respect, the main aim of this work is to know the current level of pollution at the European  
189 level after the implementation of this regulation. There will be no limitations in language in the  
190 searches performed.

## 191 **3.4. Study selection**

192 Two reviewers will independently select the studies by scanning titles and summaries and reading  
193 full texts if it is necessary according to the predefined eligibility criteria. Any disagreements  
194 regarding study selection will be solved by consulting a third reviewer.

### 195 **3.4.1. Inclusion criteria**

196 Selected articles should report on prevalence studies of emerging contaminants (pesticides). The  
197 articles selected for this review will be publications from 2015 onwards, as the EU Water  
198 Framework Directive (2000/60/EC) requires all Member States to protect and improve water  
199 quality to achieve good ecological status by 2015. In this respect, we want to know the current  
200 level of pollution at the European level after the implementation of this regulation.

201

### 202 **3.4.2. Exclusion criteria**

203 The studies must not be focused on leachates and stormwaters and be focused on prevalence  
204 studies outside of Europe, prevalence studies of other organic contaminants emerging, prevalence  
205 studies of microbiological agents, experimental studies at laboratory scale, pilot plant conditions  
206 in water treatment plants, drinking water treatment, review studies, toxicity studies of disinfection  
207 by-products (DBPs), prevalence studies of pathogenic microorganisms, resistance mechanism  
208 studies, toxicological risk assessment studies in animals, human exposure risk studies, analytical  
209 methodology studies, emerging contaminants degradation pathway studies, no project purpose.

## 210 **3.5. Data extraction and management**

### 211 **3.5.1. Data management**

212 After extracting the papers in the databases, an initial check will be performed for the presence of  
213 duplicates, followed by their proper removal, using the Rayyan QCRI tool like a reference  
214 manager.

### 215 **3.5.2. Selection process**

216 After the extraction of the papers in all databases, an initial check will be made to look  
217 for duplicates, following their proper removal using the Rayyan QCRI tool. Database  
218 records will be independently screened by two reviewers (MSV and FMR), reading titles  
219 and abstracts. The selected studies will then be fully read to assess compliance with the  
220 eligibility criteria. A manual search will be performed if any relevant studies are found  
221 using the defined search strategies. References cited in articles will be further reviewed  
222 to locate any additional relevant articles not retrieved within the primary search. All  
223 investigators (MSV, IMA, NV, ILG, RAB, IDSFP, GP) will then review the full text of  
224 all eligible studies.

225 Every step of the study selection will be documented in a flow chart, as per PRISMA  
226 guidelines [10]. A complete list of all references retrieved and separate lists for the  
227 included and the excluded at each step, with the respective reason for exclusion, will be  
228 available as well. The selection of the study is summarized in a PRISMA flow diagram  
229 (Figure 1).

230 At this stage, an agreement between the reviewers, regarding the use of the eligibility  
231 criteria, will be defined, and the evaluation of the concordance of the investigators will  
232 be using the Kappa index. Any disagreements between reviewers in any phase of study  
233 selection will be resolved by consulting another reviewer (NV).

234

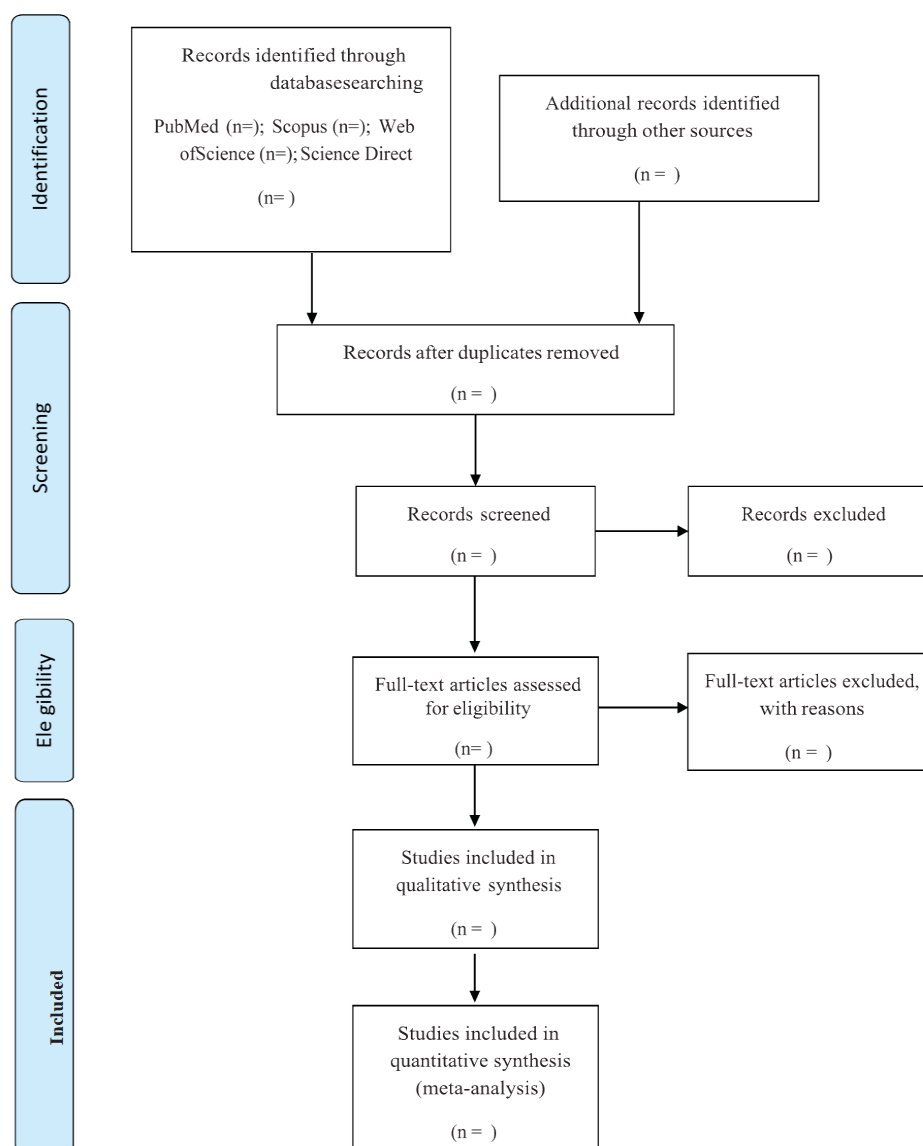

235

236 Figure 1. Flow diagram of study selection process.



### 237 **3.5.3. Data collection process**

238 A data extraction template in Excel format will be developed and piloted until convergence and  
239 agreement among data extractors is reached. The data will be independently extracted by two  
240 reviewers (MSV, IDSFP and FMR) from all literature resulted relevant after the screening  
241 process. At a minimum, two review authors will independently extract data; A third author (NV)  
242 will resolve conflicting extractions, if any.

### 243 **3.5.4. Data items**

244 We will extract relevant information from each of the selected studies. Figure 2 shows the data  
245 that will be extracted from the articles.

|                                                                                                                                                                                                                          |
|--------------------------------------------------------------------------------------------------------------------------------------------------------------------------------------------------------------------------|
| Reference of publication                                                                                                                                                                                                 |
| Year of publication                                                                                                                                                                                                      |
| Region of Europe<br>North, center and south                                                                                                                                                                              |
| Country                                                                                                                                                                                                                  |
| Location                                                                                                                                                                                                                 |
| Water type<br>Water resources (watershed, aquifer, river, marine and spring)<br>Wastewater (influent and effluent)<br>Drinking water                                                                                     |
| Sampling time<br>Month and year                                                                                                                                                                                          |
| Number of sampling sites                                                                                                                                                                                                 |
| Number of compounds analyzed                                                                                                                                                                                             |
| Chemical name of compounds analyzed                                                                                                                                                                                      |
| CASRN of compounds analyzed                                                                                                                                                                                              |
| Family of pesticides in function of the pest type<br>Insecticide (Insects)<br>Fungicide (Fungi)<br>Molluscicide (Molluscs)<br>Herbicide (Weeds)<br>Acaricide (Mites).<br>Rodenticide (Rodents)<br>Nematicide (Nematodes) |
| Detected methods of analysis<br>GC, LC, UHPLC, etc.                                                                                                                                                                      |
| Max Concentration (ng/L)                                                                                                                                                                                                 |
| Mfn Concentration (ng/L)                                                                                                                                                                                                 |
| Median Concentration (ng/L)                                                                                                                                                                                              |
| Cumulative Detection (%)                                                                                                                                                                                                 |
| Cumulative Concentration (ng/L)                                                                                                                                                                                          |
| Detection Ratio (%)                                                                                                                                                                                                      |
| Other relevant information                                                                                                                                                                                               |

246

247 Figure 2. Data extracted from the articles.

248 If a result is measured at different time points, the mean values and standard deviation  
249 will be included.

### 250 **3.6. Dealing with missing data**

251 If the extractions are unclear or incomplete, we will attempt to obtain any missing data by  
252 contacting the first or corresponding authors or co-authors of an article via phone, email, or post.  
253 If we fail to receive any necessary information, the data will be excluded from our analysis and  
254 will be addressed in the discussion section.

### 255 **3.7. Risk of bias assessment**

256 This systematic review will be conducted using the Preferred Reporting Items for Systematic  
257 Reviews and Meta-Analyses (PRISMA) guidelines [10]. Two reviewers (MSV, IDSFP and  
258 FMR) will independently evaluate the selected studies using the Checklist for Prevalence  
259 studies from JBI institute adapted for the included studies in this review [13]. In case of  
260 any doubts or discrepancies in both assessments, a third researcher (NV) will be consulted.

### 261 **3.8. Quality of evidence rating**

262 The evaluation of the soundness of the studies will be assessed based on the robustness and  
263 sensitivity of the analytical methods used for the determination and analysis of pesticide residues.

### 264 **3.9. Data synthesis**

265 All studies showing concentration data (maximum, minimum and median values) of pesticides in  
266 water resources, wastewater and drinking water in Europe will be considered. As far as possible,  
267 the following variables will be collected: region of Europe, country, location, type of water,  
268 sampling time, number of sampling sites, year of sampling, number of analyzed compounds,  
269 chemical name of analyzed compounds, CASRN of analyzed compounds, family of compounds,  
270 methods of analysis detected.

271 Meta-analysis will be performed for the two main outcomes of interest extracted from the studies  
272 with the main sources of pesticide contamination in water at European level; with the compounds  
273 that have the highest frequency of occurrence and with the level of contamination by these  
274 compounds and the areas with the highest contamination load.

275 Quantitative synthesis of the results will be performed only on studies that analyze drinking water  
276 and wastewater; furthermore, meta-analysis will be conducted only on the pesticides that will be  
277 found in Europe.

278 We will produce summary measures and synthesize the evidence quantitatively (i.e., meta-  
279 analysis). The type of model to be used for meta-analysis will be chosen based on the evidence.  
280 Meta-analysis will be likely performed using random-effects models, since we expect the sets of  
281 studies to be heterogeneous in their methods and in the characteristics of the included samples.

282 Information from all studies that will not be considered suitable for quantitative analysis will be  
283 collected in a separate table, so that a qualitative synthesis of their content is available.

284 Based on the results of the analysis of the proportion of contaminated samples, clusters that define  
285 the frequency of the contamination will be created. In particular, the contamination for each  
286 pesticide will be defined as:

- 287 • Rare: the substance is present in  $< 1\%$  of the samples.
- 288 • Relatively rare: the substance is present in 1–5% of the samples.
- 289 • Relatively common: the substance is present in 5–10% of the samples.
- 290 • Common: the substance is present in  $> 10\%$  of the samples

## 291 **4. Discussion**

292 Studies carried out in recent years reveal the presence not only of the well-known ECs but also of  
293 numerous variants of these families, in this case the study of pesticides. Pesticides can be found  
294 in the water bodies, derived above all, by the runoff from the agricultural field where they have  
295 been applied and industrial wastewaters. Especially pesticides more soluble are transported by  
296 water molecules during the precipitation event by percolating downward into the soil layers and  
297 eventually reaching surface waters and groundwater [14]. Consequently, it produces a  
298 degradation of water quality and then reduces the supply of potable water. The presence of  
299 pesticides in different environmental compartments, such as groundwater and surface water are a  
300 widespread problem. For example, pesticides with high mobility and persistence like  
301 organophosphates are detected most frequently in streams and groundwater around the world.

302 Although the use of pesticides is necessary to get higher agricultural productions, the occurrence  
303 of pesticides in the water poses a deleterious effect on human and ecosystem health, where the  
304 effect magnitude depends on the pesticide properties such as solubility, half-life, adsorption  
305 capacity or biodegradability. The effects produced in human beings can be acute or chronic. Some  
306 concrete examples of the effects of the pesticides above human health are reported in literature.  
307 The frequent exposure to chlorinated pesticides had a high chance of inducing prostate cancer and  
308 allergic or non-allergic asthma in farmers [15,16]. The study of the exposure to the  
309 organophosphate pesticides in animals induce genotoxicity effects or induce testosterone and  
310 hormone disruption in testis.

311 In order to protect public and ecosystem health, guideline levels for pesticides in drinking waters  
312 have been restricted by governments. For example, there are several guideline values for the  
313 presence of pesticides in drinking water issued by the WHO, the United States, Australia, the EU

314 and Japan. In fact, new legislations have been implemented in Europe for the use of regenerated  
315 water containing pesticides.

316 Concerns have increased, as well as the need to detect them and to employ new reduction and  
317 elimination techniques. For that reason, this study was established, since to the authors knowledge,  
318 although there are many site-specific monitoring studies, there are no studies that conduct a  
319 systematic review and meta-analysis of pesticides in Europe.

320 The study focuses on the systematic review of the status of European Mediterranean waters by  
321 meta-analysis of data collected in studies in recent years using the most relevant databases in this  
322 field of research. To establish comparative studies between the different regions of the  
323 Mediterranean area and the repercussion of these pollutants by families. To offer not only a global  
324 vision of the current situation of pharmaceuticals, drugs and personal hygiene products, but also  
325 new possibilities to increase the detection and elimination systems of these ECs.

326 Therefore, it is necessary to resort to what are known as monitoring studies that, through the  
327 design and implementation of methods, processes and procedures, guarantee, to a large extent,  
328 the follow-up and evaluation of these pesticides, as well as the implementation or execution of  
329 observation systems for the ecosystems [17]. In this respect, chemical pollution of natural waters  
330 represents a threat to the environment, with effects such as acute or chronic toxicity in aquatic  
331 organisms, accumulation of pollutants in the ecosystem and loss of habitats and biodiversity [18,  
332 19]. As a matter of priority, as set out in Directive 2013/39/EU, the causes of pollution must be  
333 identified, and pollutant emissions must be dealt with at source in the most economically and  
334 environmentally effective way [6]. There are no studies in the literature dealing specifically with  
335 this issue and the results of this study will help in the elaboration of public policies for the whole  
336 of Europe. The results obtained through this study will contribute to the development of public  
337 policies for the whole of Europe and probably for the whole world.

338

## 339 **Author contributions**

340 Manuel Serrano Valera, Isabel Martínez-Alcalá, Nuria Vela, Francisco Mateo Ramírez,  
341 Isac Davidson Santiago Fernandes Pimenta and Grasiela Piuvezam.

342 **Conceptualization:** Isabel Martínez-Alcalá, Nuria Vela, Grasiela Piuvezam.

343 **Data curation:** Manuel Serrano Valera, Francisco Mateo Ramírez, Isac Davidson  
344 Santiago Fernandes Pimenta.

345 **Formal analysis** Isabel Martínez-Alcalá, Nuria Vela.

346 **Funding acquisition:** Grasiela Piuvezam.

347 **Methodology:** Isabel Martínez-Alcalá, Nuria Vela, Grasiela Piuvezam.

348 **Project administration:** Isabel Martínez-Alcalá, Nuria Vela, Grasiela Piuvezam.

349 **Resources:** Manuel Serrano Valera, Francisco Mateo Ramírez, Isac Davidson Santiago  
350 Fernandes Pimenta

351 **Supervision:** Isabel Martínez-Alcalá, Nuria Vela, Grasiela Piuvezam.

352 **Writing – original draft:** Isabel Martínez-Alcalá, Nuria Vela, Grasiela Piuvezam.

353 **Writing – review & editing:** Manuel Serrano Valera, Isabel Martínez-Alcalá, Nuria Vela,  
354 Grasiela Piuvezam.

355

## 356 **Funding**

357 This study was financed in part by the Coordenação de Aperfeiçoamento de Pessoal de Nível  
358 Superior - Brasil (CAPES) - Finance Code 001.

359

## 360 **5. References**

361 1. UN. 2014. UN Water for Life Decade 2005-2015.

362 2. Barceló D. Emerging pollutants in water analysis. *TrAC*. 2003; 22:14-16.

363 3. Lei J, Zhang L, Li J. Wu Z, Wang Z. Overview of Emerging Contaminants and Associated  
364 Human Health Effects. *Biomed Res Int*. 2015; 404796.

365 4. Petrie B, Barden R, Kasprzyk-Hordern B. A review on emerging contaminants in wastewaters  
366 and the environment: current knowledge, understudied areas and recommendations for future  
367 monitoring. *Water Res*. 2015; 72:3-27.

368 5. Mangalgiri KP, He K, Blaney L. Emerging contaminants: a potential human health concern for  
369 sensitive populations. *PDA J Pharm Sci Technol*. 2015. 69(2):215-218.

370 6. The European Parliament and the Council of the European Union. Directive 2013/39/EU of the  
371 European Parliament and of the Council of 12 August 2013 amending Directives 2000/60/EC and

- 372 2008/105/EC as regards priority substances in the field of water policy. Official Journal of the  
373 European Community. 2013. L 22;1-17.
- 374 7. World Health Organization. 2020. State of the world's sanitation: an urgent call to transform  
375 sanitation for better health, environments, economies and societies.
- 376 8. Gorga M, Insa S, Petrovic M, Barceló D. Occurrence and spatial distribution of EDCs and  
377 related compounds in waters and sediments of Iberian rivers. *Sci. Total Environ.* 2015; 503: 69–  
378 86.
- 379 9. Ali S, Ullah MI, Sajjad A, Shakeel Q, Hussain A. Environmental and Health Effects of  
380 Pesticide Residues. In: Inamuddin MI, Lichtfouse E, editors. Sustainable Agriculture Reviews 48.  
381 Sustainable Agriculture Reviews, vol 48. Springer, Cham; 2021. P. 311-336.
- 382 10. Paszkiewicz M, Godlewska K, Lis H. Advances in suspect screening and non-target analysis  
383 of polar emerging contaminants in the environmental monitoring. *TrAC.* 2022; 116671.
- 384 11. Shamseer L, Moher D, Clarke M, Ghersi M, Liberati A, Petticrew M, et al. Preferred reporting  
385 items for systematic review and meta-analysis protocols (PRISMA-P); elaboration and  
386 explanation. *BMJ.* 2015; 349:g7647.
- 387 12. Higgins JPT, Green S, editors. Cochrane Handbook for Systematic Reviews of Interventions  
388 Version 5.1.0 [updated March 2011]. The Cochrane Collaboration. 2011. Available from:  
389 <http://handbook.cochrane.org>.
- 390 13. Joanna Briggs Institute. Checklist for Prevalence studies: Critical Appraisal tools for use in  
391 JBI Systematic Review. 2020. Available from: <https://jbi.global/critical-appraisal-tools>.
- 392 14. Pradhan SS, Gowda GB, Adak T, Guru-Pirasanna-Pandi G, Patil NB, Annamalai M, et al.  
393 Pesticides Occurrence in Water Sources and Decontamination Techniques. In: Larramendy ML,  
394 Soloneski S, editors. Pesticides - Updates on Toxicity, Efficacy and Risk Assessment [Internet].  
395 London: IntechOpen; 2022 [cited 2022 Nov 17]. Available from:  
396 <https://www.intechopen.com/chapters/81160> doi: 10.5772/intechopen.103812.
- 397 15. Hoppin JA, Umbach DM, London SJ, Henneberger PK, Kullman GJ, Coble J, et al. Pesticide  
398 use and adult-onset asthma among male farmers in the Agricultural Health Study. 2009; *Eur.*  
399 *Respir. J.* 34:1296–1303.
- 400 16. Montagner CC, Vidal C, Acayaba RD, Jardim WF, Jardim ICSF, Umbuzeiro GA. Trace  
401 analysis of pesticides and an assessment of their occurrence in surface and drinking waters from  
402 the State of São Paulo (Brazil). *Anal. Methods*, 2014; 6:6668–6677.

- 403 17. Kanoun O, Lazarević-Pašti T, Pašti I, Nasraoui S, Talbi M, Brahem A, et al. A Review of  
404 Nanocomposite-Modified Electrochemical Sensors for Water Quality Monitoring. *Sensors*. 2021;  
405 16:21(12):4131.
- 406 18. Chopra AK, Sharma MK, Chamoli S. Bioaccumulation of organochlorine pesticides in aquatic  
407 systems-an overview. *Environ Monit Assess*. 2011; 173(1-4):905-16.
- 408 19. Syafrudin M, Kristanti RA, Yuniarto A. Hadibarata T, Wedad JR, Al-onazi A, et al. Pesticides  
409 in Drinking Water-A Review. *Int J Environ Res Public Health*. 2021; 8:18(2):468.
